# Supplementary material for: The photomagnetic effect in 2-D cyanido-bridged coordination polymer [Cu(aepa)]10[Mo(CN)8]5·30H2O
Source: Royal Society of Chemistry journal article supplement (doi:10.1039/c8nj02952k), 2018-01-01
Supplement: c8nj02952k1.pdf [file c8nj02952k1.pdf]

## Electronic supplementary information (ESI) for

### The photomagnetic effect in 2-D cyanido-bridged coordination polymer **[Cu(aepa)]<sub>10</sub>[Mo(CN)<sub>8</sub>]<sub>5</sub>·30H<sub>2</sub>O**

Tomasz Korzeniak\*, Sujit Sasmal, Dawid Pinkowicz, Barbara Sieklucka  
*Faculty of Chemistry, Jagiellonian University, Gronostajowa 2, 30-387 Kraków*

Table of contents:

Fig. S1. The view on the cyanido-bridged layer of (**1**) with selected atoms labelling.

Fig. S2. The lateral view on the cyanido-bridged layered structure of (**1**).

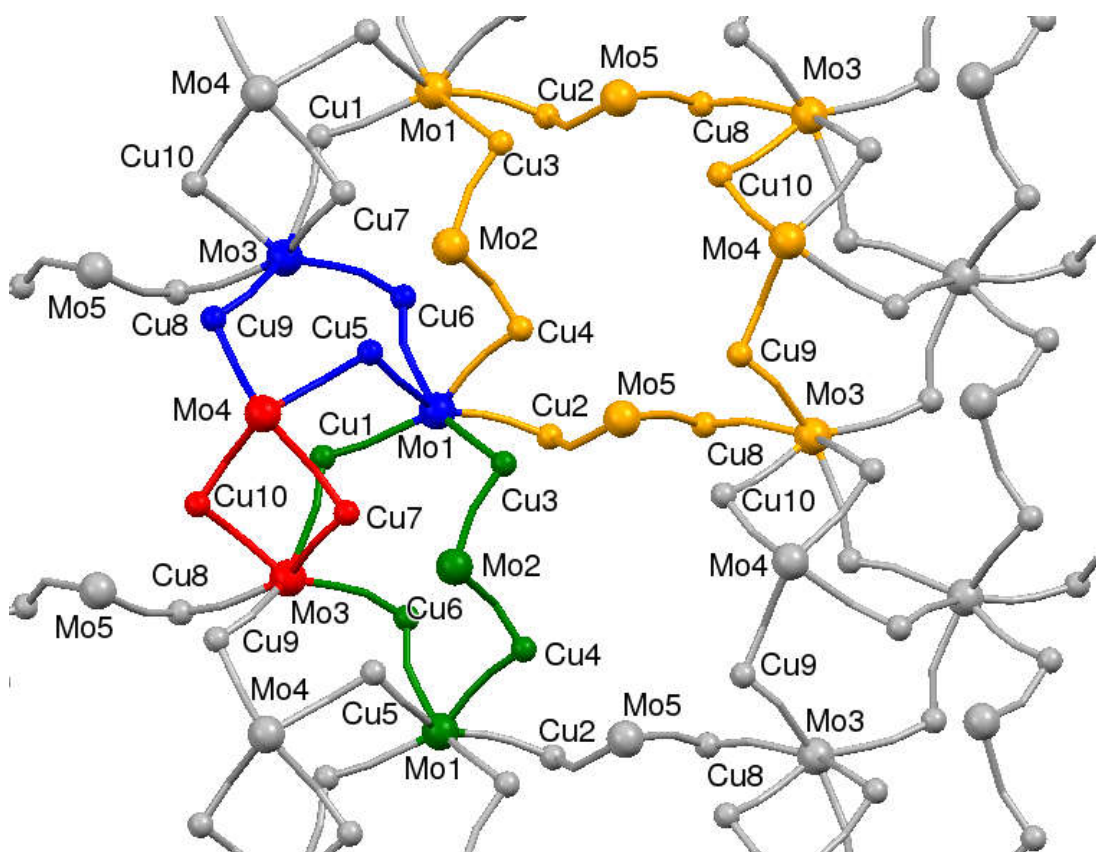

Fig. S1. The view on the cyanido-bridged layer of (**1**) with selected atoms labelling. The rings consisting of 4, 6, 8 and 16 metal centres are shown in red, blue, green and yellow, respectively.

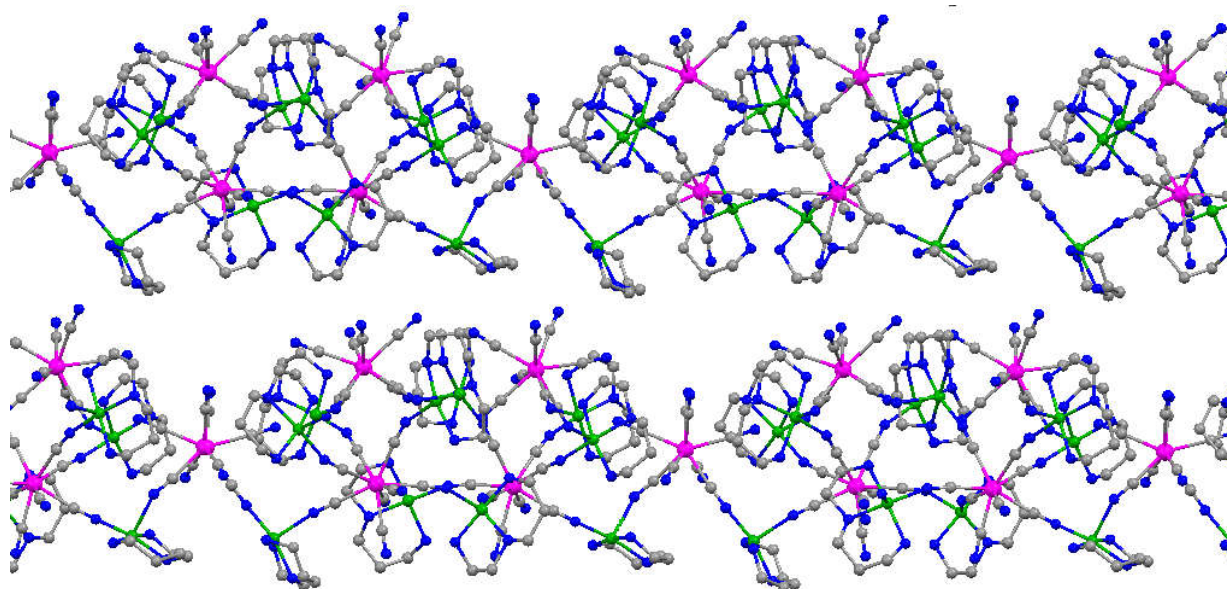

Fig. S2. The lateral view on the cyanido-bridged layered structure of **(1)**. Colours used: W - magenta, Cu - green, N - blue, C - grey.
